# Supplementary material for: Eco-Friendly UPLC–MS/MS Method for Determination of a Fostamatinib Metabolite, Tamatinib, in Plasma: Pharmacokinetic Application in Rats
Source: MDPI journal article supplement (doi:10.3390/molecules26154663), 2021-07-31
Supplement: s1 [file s1]

## Analytical Greenness report sheet

29/05/2021 00:24:52

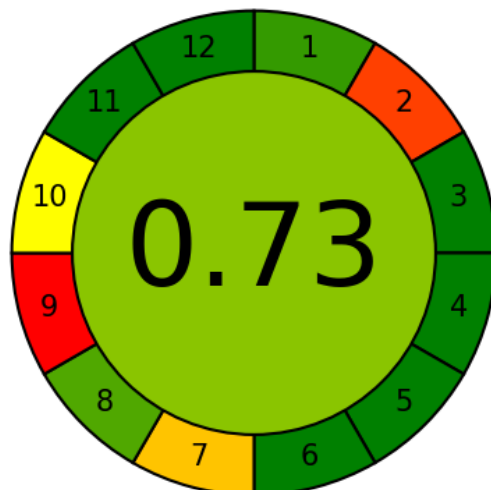

| Criteria                                                                                                                             | Score | Weight |
|--------------------------------------------------------------------------------------------------------------------------------------|-------|--------|
| 1. Direct analytical techniques should be applied to avoid sample treatment.                                                         | 0.9   | 2      |
| 2. Minimal sample size and minimal number of samples are goals.                                                                      | 0.13  | 2      |
| 3. If possible, measurements should be performed in situ.                                                                            | 1.0   | 2      |
| 4. Integration of analytical processes and operations saves energy and reduces the use of reagents.                                  | 1.0   | 2      |
| 5. Automated and miniaturized methods should be selected.                                                                            | 1.0   | 2      |
| 6. Derivatization should be avoided.                                                                                                 | 1.0   | 2      |
| 7. Generation of a large volume of analytical waste should be avoided, and proper management of analytical waste should be provided. | 0.39  | 2      |
| 8. Multi-analyte or multi-parameter methods are preferred versus methods using one analyte at a time.                                | 0.84  | 2      |
| 9. The use of energy should be minimized.                                                                                            | 0.0   | 2      |
| 10. Reagents obtained from renewable sources should be preferred.                                                                    | 0.5   | 2      |
| 11. Toxic reagents should be eliminated or replaced.                                                                                 | 1.0   | 2      |
| 12. Operator's safety should be increased.                                                                                           | 1.0   | 2      |
